# Supplementary material
Source: PubMed Central journal article supplement (PMC5382656)
Supplement: Supplemental_file_1.pdf [file Supplemental_file_1.pdf]

**Supplement Table 1: Bivariate and Multivariate Models of Readmission.**

|                                | <b>Bivariate Model</b>           |                |
|--------------------------------|----------------------------------|----------------|
|                                | <b>Odds Ratio<br/>(95% C.I.)</b> | <b>P-Value</b> |
| <b>Observed Length of Stay</b> | 1.00 (0.99-1.02)                 | 0.55           |
| <b>Expected Length of Stay</b> | 1.03 (1.01-1.05)                 | <0.001         |
| <b>Age</b>                     | 1.01 (1.01-1.02)                 | <0.001         |
| <b>Constant</b>                | 0.07 (0.06-0.08)                 | <0.001         |
|                                | <b>Multivariate Model</b>        |                |
|                                | <b>Odds Ratio<br/>(95% C.I.)</b> | <b>P-Value</b> |
| <b>Observed Length of Stay</b> | 0.98 (0.96-1.01)                 | 0.14           |
| <b>Expected Length of Stay</b> | 1.04 (1.02-1.07)                 | <0.001         |
| <b>Age</b>                     | 1.01 (1.01-1.02)                 | <0.001         |
| <b>Constant</b>                | 0.06 (0.05-0.07)                 | <0.001         |
